# Supplementary material
Source: publisher figshare collection journal article supplement (https://acs.figshare.com/ndownloader/files/5121880)
Supplement: Supplementary file 1 [file 5121880]

## Supporting Information

High-Temperature, High-Pressure Hydrothermal Synthesis, Crystal Structure, and Solid-State NMR Spectroscopy of  $\text{Cs}_2(\text{UO}_2)(\text{Si}_2\text{O}_6)$  and Variable-Temperature Powder X-ray Diffraction Study of the Hydrate Phase  $\text{Cs}_2(\text{UO}_2)(\text{Si}_2\text{O}_6)\cdot 0.5\text{H}_2\text{O}$

Chih-Shan Chen,<sup>a</sup> Ray-Kuang Chiang,<sup>b</sup> Hsien-Ming Kao,<sup>a</sup> and Kwang-Hwa Lii<sup>a,c,\*</sup>

<sup>a</sup>*Department of Chemistry, National Central University, Chungli,* <sup>b</sup>*Department of Chemical Engineering, Far East College, Tainan,* <sup>c</sup>*Institute of Chemistry, Academia Sinica, Taipei, Taiwan, R.O.C.*

**Figure S1.** Experimental X-ray powder pattern (top) and simulated powder pattern (bottom) based on the results from single-crystal X-ray diffraction for  $\text{Cs}_2(\text{UO}_2)(\text{Si}_2\text{O}_6)$ .

**Figure S2.**  $^{133}\text{Cs}$  MAS NMR spectra of  $\text{Cs}_2(\text{UO}_2)(\text{Si}_2\text{O}_6)$  (a) and  $\text{Cs}_2(\text{UO}_2)(\text{Si}_2\text{O}_6)\cdot 0.5\text{H}_2\text{O}$  (b) acquired on a NMR spectrometer of 11.7 T at a spinning speed of 26 kHz. The isotropic peaks are labeled. Asterisks denote spinning sidebands.

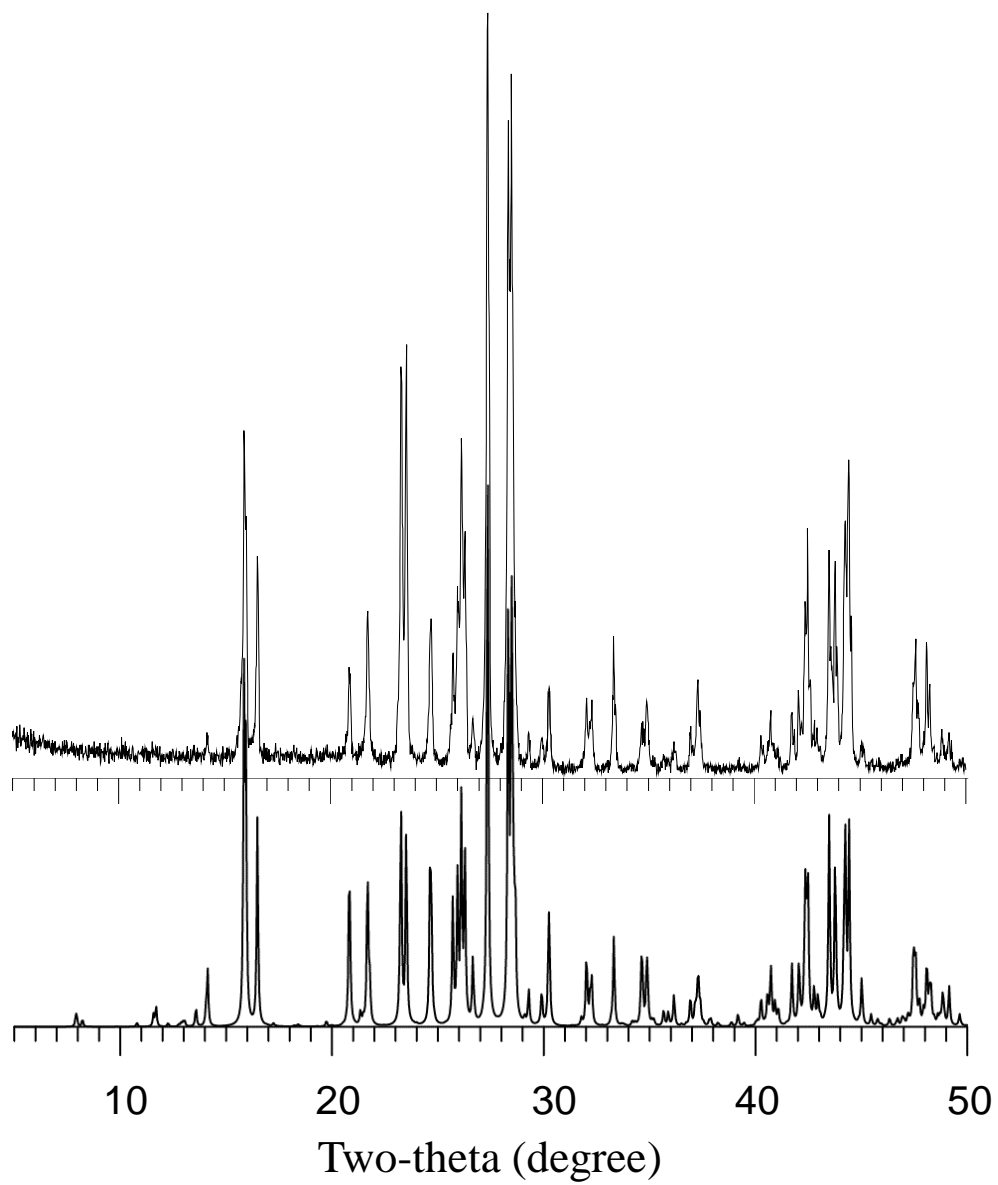

**Figure S1**

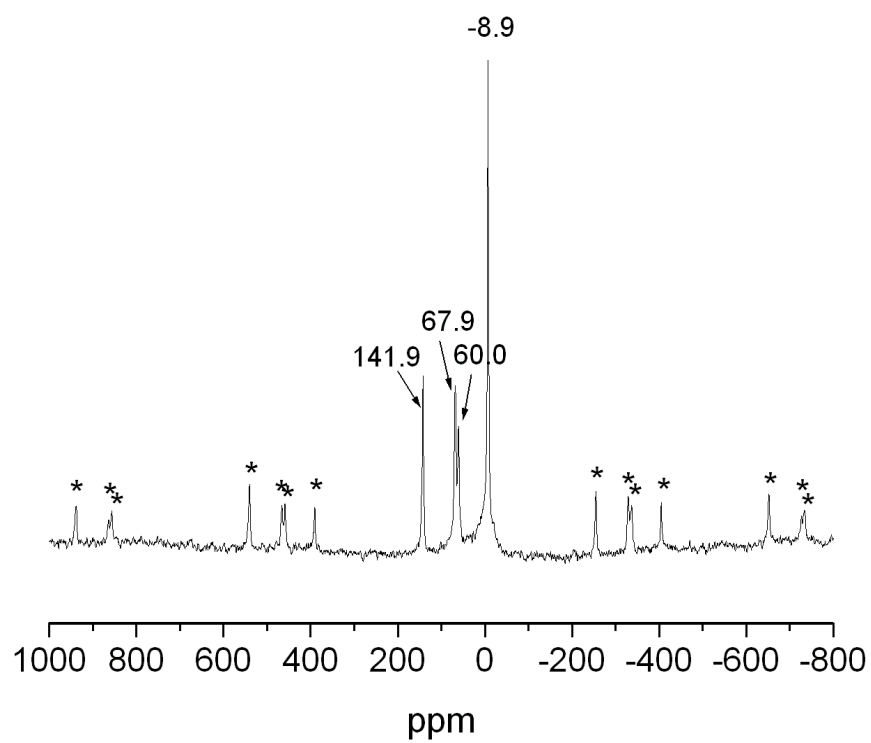

**Figure S2(a)**

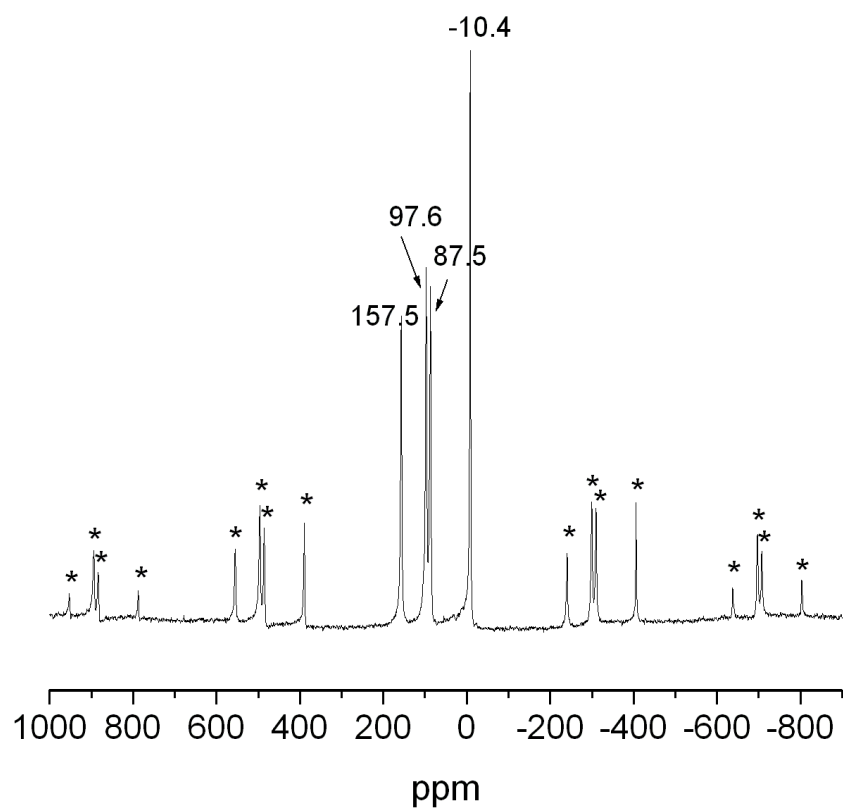

**Figure S2(b)**
